# Supplementary material for: Risk of Chronic Obstructive Pulmonary Disease Exacerbation in Patients Who Use Methotrexate—A Nationwide Study of 58,580 Outpatients
Source: MDPI journal article supplement (doi:10.3390/biomedicines9060604), 2021-05-26
Supplement: s1 [file s1]

**Table S1.** Medications from The Danish National Health Service Prescription Database identified using ATC codes.

| Medication                        | ATC-Code                                             |
|-----------------------------------|------------------------------------------------------|
| MTX                               | L01BA01, L04AX03                                     |
| ICS                               | R03BA01, R03BA02, R03BA03, R03BA05, R03BA07, R03BA08 |
| ICS/LABA combination therapy      | R03AK06, R03AK07, R03AK08, R03AK10, R03AK11, R03AK14 |
| ICS/LAMA/LABA combination therapy | R03AL08, R03AL09, R03AL12                            |
| LAMA                              | R03BB01, R03BB02, R03BB04, R03BB05, R03BB06, R03BB07 |
| LAMA/LABA combination therapy     | R03AL05, R03AL07, R03AL04, R03AL06, R03AL03          |
| LABA                              | R03AC12, R03AC13, R03AC18, R03AC19                   |
| OCS                               | H02AB06                                              |

Abbreviations: MTX, Methotrexate; ICS, Inhaled Corticosteroids; LABA, long-acting beta-agonist; LAMA, long-acting muscarinic antagonist; OCS, Oral Corticosteroids

**Table S2:** Diagnoses identified using ICD-10 codes from The Danish National Patient Register.

| <b>Diagnosis</b>                 | <b>ICD-10 Code</b>                                                                                                    |
|----------------------------------|-----------------------------------------------------------------------------------------------------------------------|
| Sarcoidosis                      | D86                                                                                                                   |
| Heart failure                    | I50                                                                                                                   |
| Ischemic heart disease           | I21–I25                                                                                                               |
| Diabetes                         | E10–E14                                                                                                               |
| Peptic ulcer                     | K25–K28                                                                                                               |
| Dementia                         | F00 – F03                                                                                                             |
| Solid, metastatic tumour         | C77–C80                                                                                                               |
| Hemiplegia or paraplegia         | G80–G83                                                                                                               |
| Renal failure                    | I120, I131, I132, E102, E112, E122, E132, E142, N02-N08, N11, N14, N150, N158 – N165, N168, N169, N18, N19, N26, Z992 |
| Peripheral vascular disease      | I70 – I74, I77, I79                                                                                                   |
| Cerebrovascular disease          | I60 – I64, I67, G45, G46                                                                                              |
| Rheumatic disease                | M05, M06, M32–M36                                                                                                     |
| Malignant tumours                | C00–C26, C30–C34, C37–C41, C45–C58, C60–C76, C81–C85, C90–C97, C43, C88                                               |
| Mild liver disease               | B18, K73, K74, K717, K768, K769, K760, K709, K700–K703, K713–K715, K762–K764                                          |
| Moderate to severe liver disease | I850, I859, I864, I982, K704, K711, K721, K729, K765, K766, K767                                                      |
| AECOPD                           | J12–J18, J20–J22, J40–J44, J96                                                                                        |

Abbreviations: AECOPD, acute hospitalization-requiring exacerbation of COPD
